# Supplementary material for: Using a Short Food Frequency Questionnaire to Evaluate Macronutrients, Fiber, Phosphorus, Potassium, and Calcium in Adults with Stages 3–5 Chronic Kidney Disease
Source: MDPI journal article supplement (doi:10.3390/ijerph191911998), 2022-09-22
Supplement: s1 [file s1]

**Manuscript Title: Using a Short Food Frequency Questionnaire to Evaluate Macronutrients, Fiber, Phosphorus, Potassium, and Calcium in Adults with Stages 3 – 5 Chronic Kidney Disease**

**Supplementary Table S1**

**42 item Short - Food frequency questionnaire (SFFQ) for chronic kidney disease (CKD)**

| Food items                                                                                                                                                                                                     | Frequency of food intake                                                                                                                                                                                                                          | Number of servings                                                                                                                                                                              |
|----------------------------------------------------------------------------------------------------------------------------------------------------------------------------------------------------------------|---------------------------------------------------------------------------------------------------------------------------------------------------------------------------------------------------------------------------------------------------|-------------------------------------------------------------------------------------------------------------------------------------------------------------------------------------------------|
|                                                                                                                                                                                                                | never or less than once<br>$\leq 1$ per month<br>2-3 per month<br>1-2 per week<br>3-4 per week<br>5-6 per week<br>1 per day<br>2-3 per day<br>4-6 per day                                                                                         | never or less than once<br><1 serving per time<br>1 servings per time<br>2 servings per time<br>3 servings per time<br>4 servings per time<br>5 servings per time<br>$\geq 6$ servings per time |
| <b>1. Eggs (Chicken, duck, and bird eggs)</b><br>One serving = an egg, five pigeon eggs, two egg white                                                                                                         |                                                                                                                                                                                                                                                   |                                                                                                                                                                                                 |
| <b>2. Seafood (Prawn, calamari, crab, oyster, squid, and scallops)</b><br>One serving = 4-6 prawns, 6 large clams, 22 small clams, 4 sliced of squids, 8 oysters, half a crab, 3 scallops, 2 cuttlefishes      |                                                                                                                                                                                                                                                   |                                                                                                                                                                                                 |
| <b>3. Marine fish (Spanish mackerel, mackerel pike, salmon, ribbon fish, tilapia, and snapper, tuna)</b><br>One serving = three fingers wide with a thickness of 1 cm= 2 fingers wide with a thickness of 2 cm |                                                                                                                                                                                                                                                   |                                                                                                                                                                                                 |
| <b>4. Freshwater fish (Milk fish/white mullet, tilapia, eel, and herring)</b><br>One serving = three fingers wide with a thickness of 1 cm = 2 fingers wide with a thickness of 2 cm                           |                                                                                                                                                                                                                                                   |                                                                                                                                                                                                 |
| <b>5. How often are the above-mentioned fishes fried or deep-fried?</b>                                                                                                                                        | <b>Approximately _____% fried</b><br><input type="checkbox"/> 0% <input type="checkbox"/> 1~20% <input type="checkbox"/> 21~40% <input type="checkbox"/> 41~61% <input type="checkbox"/> 61~80%<br><input type="checkbox"/> 81~100 %              |                                                                                                                                                                                                 |
| <b>6. How often are the above-mentioned fishes grilled or steamed?</b>                                                                                                                                         | <b>Approximately _____% grilled or steamed</b><br><input type="checkbox"/> 0% <input type="checkbox"/> 1~20% <input type="checkbox"/> 21~40% <input type="checkbox"/> 41~61% <input type="checkbox"/> 61~80%<br><input type="checkbox"/> 81~100 % |                                                                                                                                                                                                 |
| <b>7. Pork (pork ribs/chop/tendon, pork slices, and shoulder roast)</b><br>One serving = three fingers wide with 1 cm thickness                                                                                |                                                                                                                                                                                                                                                   |                                                                                                                                                                                                 |
| <b>8. Beef and lamb</b><br>One serving = three fingers wide with 1 cm thickness                                                                                                                                |                                                                                                                                                                                                                                                   |                                                                                                                                                                                                 |
| <b>9. Chicken</b><br>One serving = three fingers wide with 1 cm                                                                                                                                                |                                                                                                                                                                                                                                                   |                                                                                                                                                                                                 |

| Food items                                                                                                                                                                                                     | Frequency of food intake                                                                                                                                                                                                       | Number of servings                                                                                                                                                                              |
|----------------------------------------------------------------------------------------------------------------------------------------------------------------------------------------------------------------|--------------------------------------------------------------------------------------------------------------------------------------------------------------------------------------------------------------------------------|-------------------------------------------------------------------------------------------------------------------------------------------------------------------------------------------------|
|                                                                                                                                                                                                                | never or less than once<br>$\leq 1$ per month<br>2-3 per month<br>1-2 per week<br>3-4 per week<br>5-6 per week<br>1 per day<br>2-3 per day<br>4-6 per day                                                                      | never or less than once<br><1 serving per time<br>1 servings per time<br>2 servings per time<br>3 servings per time<br>4 servings per time<br>5 servings per time<br>$\geq 6$ servings per time |
| thickness, 1/2 chicken drumstick, and 1 chicken wing                                                                                                                                                           |                                                                                                                                                                                                                                |                                                                                                                                                                                                 |
| <b>10. Duck and goose</b><br>One serving = three fingers wide with 1 cm thickness, 1/2 duck/goose drumstick, and 1 duck/goose wing                                                                             |                                                                                                                                                                                                                                |                                                                                                                                                                                                 |
| <b>11. How often are the above-mentioned meats fried or deep-fried?</b>                                                                                                                                        | Approximately _____ % fried<br><input type="checkbox"/> 0% <input type="checkbox"/> 1~20% <input type="checkbox"/> 21~40% <input type="checkbox"/> 41~61% <input type="checkbox"/> 61~80%<br><input type="checkbox"/> 81~100 % |                                                                                                                                                                                                 |
| <b>12. Milk (Skimmed milk, light milk, and whole milk)</b><br>One serving = 240 c.c. of milk, 3-4 tablespoons of whole milk powder, 3 tablespoons of light milk powder, 2.5 tablespoons of skimmed milk powder |                                                                                                                                                                                                                                |                                                                                                                                                                                                 |
| <b>13. Yogurt, yogurt drinks</b><br>One serving = 240 c.c. yogurt drink, 200 c.c. yoghurt                                                                                                                      |                                                                                                                                                                                                                                |                                                                                                                                                                                                 |
| <b>14. Processed dairy products (Cheese slices, panna cotta, ice cream)</b><br>One serving = 2 pieces of cheese slices, 1 cup of soft-serve ice cream, 120 c.c. of panna cotta                                 |                                                                                                                                                                                                                                |                                                                                                                                                                                                 |
| <b>15. Soy products (fresh tofu, soy milk)</b><br>One serving = 1/2 box soft fresh tofu , 1/2 block of firm tofu (80 g), 240 c.c. of soy milk                                                                  |                                                                                                                                                                                                                                |                                                                                                                                                                                                 |
| <b>16. Other soy products (Dried tofu, tofu skin, and fried bean curd)</b><br>One serving = piece dried tofu, 1 slice tofu skin, and 2 blocks of fried bean curd                                               |                                                                                                                                                                                                                                |                                                                                                                                                                                                 |
| <b>17. Dark-green colored vegetables (Broccoli, spinach, mushroom, sweet potato leaves, and Chinese green vegetables)</b><br>One serving = 1/2 bowl cooked vegetables                                          |                                                                                                                                                                                                                                |                                                                                                                                                                                                 |
| <b>18. Light-green colored vegetables (Cabbage, Chinese cabbage, Chinese radish, cauliflower, and water bamboo)</b><br>One serving = 1/2 bowl cooked vegetables                                                |                                                                                                                                                                                                                                |                                                                                                                                                                                                 |
| <b>19. Other vegetables (cucumber, bitter melon, winter melon, loofah, tomato, eggplant,</b>                                                                                                                   |                                                                                                                                                                                                                                |                                                                                                                                                                                                 |

| Food items                                                                                                                                                                                                | Frequency of food intake                                                                                                                                                                                                       | Number of servings                                                                                                                                                                         |
|-----------------------------------------------------------------------------------------------------------------------------------------------------------------------------------------------------------|--------------------------------------------------------------------------------------------------------------------------------------------------------------------------------------------------------------------------------|--------------------------------------------------------------------------------------------------------------------------------------------------------------------------------------------|
|                                                                                                                                                                                                           | never or less than once<br>≤ 1 per month<br>2-3 per month<br>1-2 per week<br>3-4 per week<br>5-6 per week<br>1 per day<br>2-3 per day<br>4-6 per day                                                                           | never or less than once<br><1 serving per time<br>1 servings per time<br>2 servings per time<br>3 servings per time<br>4 servings per time<br>5 servings per time<br>≥ 6 servings per time |
| <b>okra, green/sweet pepper, asparagus, carrot, onion, garlic, Chinese leek, and green onion, ginger)</b><br>One serving = 1/2 bowl cooked vegetables                                                     |                                                                                                                                                                                                                                |                                                                                                                                                                                            |
| <b>20. Mushroom (white mushroom, hericium, enoki mushroom, fungus, and king oyster mushroom)</b><br>One serving = 1/2 bowl cooked vegetables                                                              |                                                                                                                                                                                                                                |                                                                                                                                                                                            |
| <b>21. How often are the above-mentioned vegetables fried or using sauce?</b>                                                                                                                             | Approximately _____ % fried<br><input type="checkbox"/> 0% <input type="checkbox"/> 1~20% <input type="checkbox"/> 21~40% <input type="checkbox"/> 41~61% <input type="checkbox"/> 61~80%<br><input type="checkbox"/> 81~100 % |                                                                                                                                                                                            |
| <b>22. Chinese staples - Rice</b><br>One portion = 1 bowl rice, 2 bowl porridge                                                                                                                           |                                                                                                                                                                                                                                |                                                                                                                                                                                            |
| <b>23. Chinese staples – Noodles</b><br>One portion = 1 bowl noodles, 2 bowls rice noodles                                                                                                                |                                                                                                                                                                                                                                |                                                                                                                                                                                            |
| <b>24. How often are the above Chinese staple foods fried? (Fried rice/noodles/rice noodles, biscuits fried dough sticks, dried noodles, braised pork rice)</b>                                           | Approximately _____ % fried<br><input type="checkbox"/> 0% <input type="checkbox"/> 1~20% <input type="checkbox"/> 21~40% <input type="checkbox"/> 41~61% <input type="checkbox"/> 61~80%<br><input type="checkbox"/> 81~100 % |                                                                                                                                                                                            |
| <b>25. Toast, bagel, bun, and steamed bun</b><br>One portion = 2 slices of thick toast, 4 slices of regular toast, 4 buns, 1 bagel, 1 steamed bun                                                         |                                                                                                                                                                                                                                |                                                                                                                                                                                            |
| <b>26. Whole wheat bread</b><br>One portion = 2 slices of thick toast, 4 slices of regular toast                                                                                                          |                                                                                                                                                                                                                                |                                                                                                                                                                                            |
| <b>27. Bread with filling (soft roll, croissant, sweet bun, red bean bun, pineapple bun, and butter bread)</b><br>One portion = 1 croissant, 1 sweet bun, 1 red bean bun, 1 pineapple bun, 1 butter bread |                                                                                                                                                                                                                                |                                                                                                                                                                                            |
| <b>28. Root vegetables(Sweet potato, potato, taro, water caltrop, lotus root, Chinese yam, corn, and pumpkin)</b><br>One serving = 4 hobs or 1/2 bowl, 1/2 cob of corn,                                   |                                                                                                                                                                                                                                |                                                                                                                                                                                            |
| <b>29. Low nitrogen staple foods (Rice noodle, bean noodle, pearl sago/tapioca, and tapioca starch)</b><br>One Portion = 1 bowl of rice noodle/bean noodle,                                               |                                                                                                                                                                                                                                |                                                                                                                                                                                            |

| Food items                                                                                                                                                                                                                                                | Frequency of food intake                                                                                                                                  | Number of servings                                                                                                                                                                              |
|-----------------------------------------------------------------------------------------------------------------------------------------------------------------------------------------------------------------------------------------------------------|-----------------------------------------------------------------------------------------------------------------------------------------------------------|-------------------------------------------------------------------------------------------------------------------------------------------------------------------------------------------------|
|                                                                                                                                                                                                                                                           | never or less than once<br>$\leq 1$ per month<br>2-3 per month<br>1-2 per week<br>3-4 per week<br>5-6 per week<br>1 per day<br>2-3 per day<br>4-6 per day | never or less than once<br><1 serving per time<br>1 servings per time<br>2 servings per time<br>3 servings per time<br>4 servings per time<br>5 servings per time<br>$\geq 6$ servings per time |
| 4 tablespoon of tapioca pearls, 4 tablespoon tapioca starch                                                                                                                                                                                               |                                                                                                                                                           |                                                                                                                                                                                                 |
| <b>30. High potassium fruits (Cantaloupe, strawberry, kiwi, cherry tomato, and peach)</b><br>One serving = 1 small-medium fruit (1 feast), 1/2-2/3 cup fresh fruits (80-120 g)                                                                            |                                                                                                                                                           |                                                                                                                                                                                                 |
| <b>31. Moderate potassium fruits(California plums, sunkist, oranges, grapes, and guavas, papaya)</b><br>One serving = 1 small-medium fruit (1 feast), 1/2-2/3 cup fresh fruits (80-120 g)                                                                 |                                                                                                                                                           |                                                                                                                                                                                                 |
| <b>32. Low-potassium fruits (Wax apple, pineapple, mango, apple, watermelon, and pear)</b><br>One serving = 1 small-medium fruit (1 feast), 1/2-2/3 cup fresh fruits (80-120 g)                                                                           |                                                                                                                                                           |                                                                                                                                                                                                 |
| <b>33. Banana</b><br>One serving = 1/2 medium banana                                                                                                                                                                                                      |                                                                                                                                                           |                                                                                                                                                                                                 |
| <b>34. 100% fresh fruit juice</b><br>One serving = 1/2 cup (about 120 c.c.)                                                                                                                                                                               |                                                                                                                                                           |                                                                                                                                                                                                 |
| <b>35. 10% sweetened fruit juice (Bottled juice or fresh juice with sugar, and condensed juice)</b><br>One serving = 1/2 cup (120-150 c.c.)                                                                                                               |                                                                                                                                                           |                                                                                                                                                                                                 |
| <b>36. Cereal-based beverages</b><br>One portion = 280-300 cc oat/cereal milk = 6 tablespoon oat = 4 tablespoon whole grain powder= 3 tablespoon pearl barley                                                                                             |                                                                                                                                                           |                                                                                                                                                                                                 |
| <b>37. Seeds and nuts (peanut, pine nuts, almond, pistachio, walnut, cashew nut, sesame, and pumpkin seeds)</b><br>One serving = pine nuts 1 table spoon, 10 peanut, 6-8 almond, 15 pistachio, 2 walnut, 6-7 cashew nut, 50 melon seeds, 40 pumpkin seeds |                                                                                                                                                           |                                                                                                                                                                                                 |
| <b>38. Vegetable fats and oils (soybean oil, olive oil, safflower seed oil, canola oil, corn oil, palm oil, and coconut oil)</b><br>One serving = 1 teaspoon                                                                                              |                                                                                                                                                           |                                                                                                                                                                                                 |
| <b>39. Animal fat and oils and Hydrogenated oils</b>                                                                                                                                                                                                      |                                                                                                                                                           |                                                                                                                                                                                                 |

| Food items                                                                                             | Frequency of food intake                                                                                                                                                                     | Number of servings                                                                                                                                                                              |
|--------------------------------------------------------------------------------------------------------|----------------------------------------------------------------------------------------------------------------------------------------------------------------------------------------------|-------------------------------------------------------------------------------------------------------------------------------------------------------------------------------------------------|
|                                                                                                        | never or less than once<br>$\leq 1$ per month<br>2-3 per month<br>1-2 per week<br>3-4 per week<br>5-6 per week<br>1 per day<br>2-3 per day<br>4-6 per day                                    | never or less than once<br><1 serving per time<br>1 servings per time<br>2 servings per time<br>3 servings per time<br>4 servings per time<br>5 servings per time<br>$\geq 6$ servings per time |
| One serving = 2 teaspoon of butter/cream/lard, one teaspoon of hydrogenated oils                       |                                                                                                                                                                                              |                                                                                                                                                                                                 |
| <b>40. Hand-shaken beverages</b><br>if you answer question 40, please go on to answer questions 41, 42 |                                                                                                                                                                                              |                                                                                                                                                                                                 |
| <b>41. Cup size</b>                                                                                    | <input type="checkbox"/> small (360 ml) <input type="checkbox"/> medium (500 ml) <input type="checkbox"/> big (750 ml)<br><input type="checkbox"/> extra-large (1000 ml)                     |                                                                                                                                                                                                 |
| <b>42. Sugar contents</b>                                                                              | <input type="checkbox"/> sugar-free <input type="checkbox"/> quarter sugar <input type="checkbox"/> half sugar<br><input type="checkbox"/> less sugar <input type="checkbox"/> regular sugar |                                                                                                                                                                                                 |
